# Supplementary material for: Ellagic Acid Alleviates Diquat-Induced Jejunum Oxidative Stress in C57BL/6 Mice through Activating Nrf2 Mediated Signaling Pathway
Source: MDPI journal article supplement (doi:10.3390/nu14051103), 2022-03-05
Supplement: s1 [file s1]

Supplementary Material

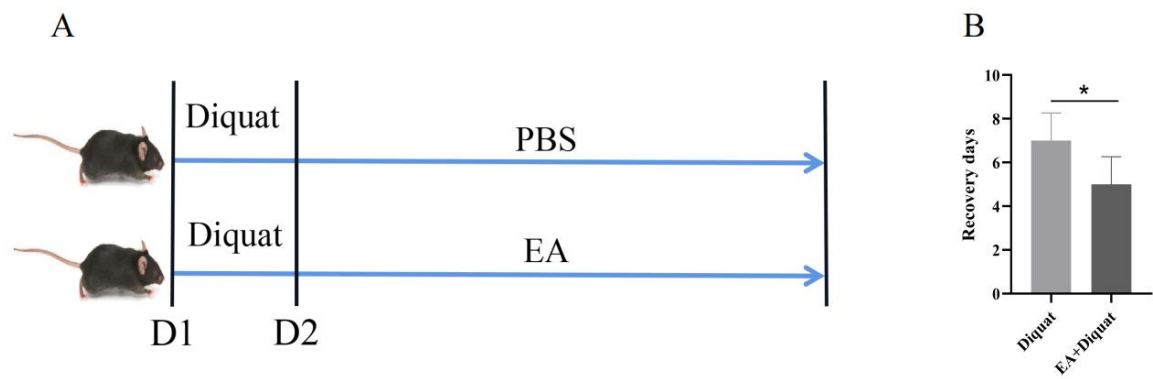

**Figure S1:** Therapeutic ellagic acid treatment shortened the time for the mice to return to their initial weight when challenged with diquat. **(A)** The treatment experimental scheme of mice. **(B)** The time for the mice to return to their initial weight when challenged with diquat. \* means  $p < 0.05$  between two groups. All data were presented as mean  $\pm$  S.E.M (n = 6).
